# Supplementary material for: Basin-scale heterogeneity in Antarctic precipitation and its impact on surface mass variability
Source: Copernicus journal article supplement (doi:10.5194/tc-11-2595-2017), 2017-11-15
Supplement: Supplementary file 1 [file tc-11-2595-2017-supplement.zip]

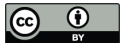

## *Supplement of*

# **Basin-scale heterogeneity in Antarctic precipitation and its impact on surface mass variability**

**Jeremy Fyke et al.**

*Correspondence to:* Jeremy Fyke (fyke@lanl.gov)

- tc-11-2595-2017-supplement-title-page.pdf
- Supplemental\_Material
  - .DS\_Store
  - .png.png
  - Figure\_4\_Supplemental\_Plots
    - \* dMoisture\_transport\_plus\_basin\_correlation01.png
    - \* dMoisture\_transport\_plus\_basin\_correlation02.png
    - \* dMoisture\_transport\_plus\_basin\_correlation03.png
    - \* dMoisture\_transport\_plus\_basin\_correlation04.png
    - \* dMoisture\_transport\_plus\_basin\_correlation05.png
    - \* dMoisture\_transport\_plus\_basin\_correlation06.png
    - \* dMoisture\_transport\_plus\_basin\_correlation07.png
    - \* dMoisture\_transport\_plus\_basin\_correlation08.png
    - \* dMoisture\_transport\_plus\_basin\_correlation09.png
    - \* dMoisture\_transport\_plus\_basin\_correlation10.png
    - \* dMoisture\_transport\_plus\_basin\_correlation11.png
    - \* dMoisture\_transport\_plus\_basin\_correlation12.png
    - \* dMoisture\_transport\_plus\_basin\_correlation13.png
    - \* dMoisture\_transport\_plus\_basin\_correlation14.png
    - \* dMoisture\_transport\_plus\_basin\_correlation15.png
    - \* dMoisture\_transport\_plus\_basin\_correlation16.png
    - \* dMoisture\_transport\_plus\_basin\_correlation17.png
    - \* dMoisture\_transport\_plus\_basin\_correlation18.png
    - \* dMoisture\_transport\_plus\_basin\_correlation19.png
    - \* dMoisture\_transport\_plus\_basin\_correlation20.png
    - \* dMoisture\_transport\_plus\_basin\_correlation21.png
    - \* dMoisture\_transport\_plus\_basin\_correlation22.png

- \* dMoisture\_transport\_plus\_basin\_correlation23.png
- \* dMoisture\_transport\_plus\_basin\_correlation24.png
- \* dMoisture\_transport\_plus\_basin\_correlation25.png
- \* dMoisture\_transport\_plus\_basin\_correlation26.png
- \* dMoisture\_transport\_plus\_basin\_correlation27.png

– Figure\_5\_Supplemental\_Plots

- \* dz500\_transport\_plus\_basin\_correlation01.png
- \* dz500\_transport\_plus\_basin\_correlation02.png
- \* dz500\_transport\_plus\_basin\_correlation03.png
- \* dz500\_transport\_plus\_basin\_correlation04.png
- \* dz500\_transport\_plus\_basin\_correlation05.png
- \* dz500\_transport\_plus\_basin\_correlation06.png
- \* dz500\_transport\_plus\_basin\_correlation07.png
- \* dz500\_transport\_plus\_basin\_correlation08.png
- \* dz500\_transport\_plus\_basin\_correlation09.png
- \* dz500\_transport\_plus\_basin\_correlation10.png
- \* dz500\_transport\_plus\_basin\_correlation11.png
- \* dz500\_transport\_plus\_basin\_correlation12.png
- \* dz500\_transport\_plus\_basin\_correlation13.png
- \* dz500\_transport\_plus\_basin\_correlation14.png
- \* dz500\_transport\_plus\_basin\_correlation15.png
- \* dz500\_transport\_plus\_basin\_correlation16.png
- \* dz500\_transport\_plus\_basin\_correlation17.png
- \* dz500\_transport\_plus\_basin\_correlation18.png
- \* dz500\_transport\_plus\_basin\_correlation19.png
- \* dz500\_transport\_plus\_basin\_correlation20.png
- \* dz500\_transport\_plus\_basin\_correlation21.png
- \* dz500\_transport\_plus\_basin\_correlation22.png
- \* dz500\_transport\_plus\_basin\_correlation23.png
- \* dz500\_transport\_plus\_basin\_correlation24.png
- \* dz500\_transport\_plus\_basin\_correlation25.png
- \* dz500\_transport\_plus\_basin\_correlation26.png
- \* dz500\_transport\_plus\_basin\_correlation27.png

– Figure\_6\_Supplemental\_Plots

- \* dMoisture\_dSIC\_dPE01.png
- \* dMoisture\_dSIC\_dPE02.png
- \* dMoisture\_dSIC\_dPE03.png
- \* dMoisture\_dSIC\_dPE04.png
- \* dMoisture\_dSIC\_dPE05.png
- \* dMoisture\_dSIC\_dPE06.png
- \* dMoisture\_dSIC\_dPE07.png
- \* dMoisture\_dSIC\_dPE08.png
- \* dMoisture\_dSIC\_dPE09.png
- \* dMoisture\_dSIC\_dPE10.png
- \* dMoisture\_dSIC\_dPE11.png
- \* dMoisture\_dSIC\_dPE12.png
- \* dMoisture\_dSIC\_dPE13.png

- \* dMoisture\_dSIC\_dPE14.png
- \* dMoisture\_dSIC\_dPE15.png
- \* dMoisture\_dSIC\_dPE16.png
- \* dMoisture\_dSIC\_dPE17.png
- \* dMoisture\_dSIC\_dPE18.png
- \* dMoisture\_dSIC\_dPE19.png
- \* dMoisture\_dSIC\_dPE20.png
- \* dMoisture\_dSIC\_dPE21.png
- \* dMoisture\_dSIC\_dPE22.png
- \* dMoisture\_dSIC\_dPE23.png
- \* dMoisture\_dSIC\_dPE24.png
- \* dMoisture\_dSIC\_dPE25.png
- \* dMoisture\_dSIC\_dPE26.png
- \* dMoisture\_dSIC\_dPE27.png

– Figure\_7\_Supplemental\_Plots

- \* EvolvingCorrelationBasins\_1-10.png
- \* EvolvingCorrelationBasins\_1-11.png
- \* EvolvingCorrelationBasins\_1-12.png
- \* EvolvingCorrelationBasins\_1-13.png
- \* EvolvingCorrelationBasins\_1-14.png
- \* EvolvingCorrelationBasins\_1-15.png
- \* EvolvingCorrelationBasins\_1-16.png
- \* EvolvingCorrelationBasins\_1-17.png
- \* EvolvingCorrelationBasins\_1-18.png
- \* EvolvingCorrelationBasins\_1-19.png
- \* EvolvingCorrelationBasins\_1-2.png
- \* EvolvingCorrelationBasins\_1-20.png
- \* EvolvingCorrelationBasins\_1-21.png
- \* EvolvingCorrelationBasins\_1-22.png
- \* EvolvingCorrelationBasins\_1-23.png
- \* EvolvingCorrelationBasins\_1-24.png
- \* EvolvingCorrelationBasins\_1-25.png
- \* EvolvingCorrelationBasins\_1-26.png
- \* EvolvingCorrelationBasins\_1-27.png
- \* EvolvingCorrelationBasins\_1-3.png
- \* EvolvingCorrelationBasins\_1-4.png
- \* EvolvingCorrelationBasins\_1-5.png
- \* EvolvingCorrelationBasins\_1-6.png
- \* EvolvingCorrelationBasins\_1-7.png
- \* EvolvingCorrelationBasins\_1-8.png
- \* EvolvingCorrelationBasins\_1-9.png
- \* EvolvingCorrelationBasins\_10-11.png
- \* EvolvingCorrelationBasins\_10-12.png
- \* EvolvingCorrelationBasins\_10-13.png
- \* EvolvingCorrelationBasins\_10-14.png
- \* EvolvingCorrelationBasins\_10-15.png
- \* EvolvingCorrelationBasins\_10-16.png

- \* EvolvingCorrelationBasins\_10-17.png
- \* EvolvingCorrelationBasins\_10-18.png
- \* EvolvingCorrelationBasins\_10-19.png
- \* EvolvingCorrelationBasins\_10-20.png
- \* EvolvingCorrelationBasins\_10-21.png
- \* EvolvingCorrelationBasins\_10-22.png
- \* EvolvingCorrelationBasins\_10-23.png
- \* EvolvingCorrelationBasins\_10-24.png
- \* EvolvingCorrelationBasins\_10-25.png
- \* EvolvingCorrelationBasins\_10-26.png
- \* EvolvingCorrelationBasins\_10-27.png
- \* EvolvingCorrelationBasins\_11-12.png
- \* EvolvingCorrelationBasins\_11-13.png
- \* EvolvingCorrelationBasins\_11-14.png
- \* EvolvingCorrelationBasins\_11-15.png
- \* EvolvingCorrelationBasins\_11-16.png
- \* EvolvingCorrelationBasins\_11-17.png
- \* EvolvingCorrelationBasins\_11-18.png
- \* EvolvingCorrelationBasins\_11-19.png
- \* EvolvingCorrelationBasins\_11-20.png
- \* EvolvingCorrelationBasins\_11-21.png
- \* EvolvingCorrelationBasins\_11-22.png
- \* EvolvingCorrelationBasins\_11-23.png
- \* EvolvingCorrelationBasins\_11-24.png
- \* EvolvingCorrelationBasins\_11-25.png
- \* EvolvingCorrelationBasins\_11-26.png
- \* EvolvingCorrelationBasins\_11-27.png
- \* EvolvingCorrelationBasins\_12-13.png
- \* EvolvingCorrelationBasins\_12-14.png
- \* EvolvingCorrelationBasins\_12-15.png
- \* EvolvingCorrelationBasins\_12-16.png
- \* EvolvingCorrelationBasins\_12-17.png
- \* EvolvingCorrelationBasins\_12-18.png
- \* EvolvingCorrelationBasins\_12-19.png
- \* EvolvingCorrelationBasins\_12-20.png
- \* EvolvingCorrelationBasins\_12-21.png
- \* EvolvingCorrelationBasins\_12-22.png
- \* EvolvingCorrelationBasins\_12-23.png
- \* EvolvingCorrelationBasins\_12-24.png
- \* EvolvingCorrelationBasins\_12-25.png
- \* EvolvingCorrelationBasins\_12-26.png
- \* EvolvingCorrelationBasins\_12-27.png
- \* EvolvingCorrelationBasins\_13-14.png
- \* EvolvingCorrelationBasins\_13-15.png
- \* EvolvingCorrelationBasins\_13-16.png
- \* EvolvingCorrelationBasins\_13-17.png
- \* EvolvingCorrelationBasins\_13-18.png

- \* EvolvingCorrelationBasins\_13-19.png
- \* EvolvingCorrelationBasins\_13-20.png
- \* EvolvingCorrelationBasins\_13-21.png
- \* EvolvingCorrelationBasins\_13-22.png
- \* EvolvingCorrelationBasins\_13-23.png
- \* EvolvingCorrelationBasins\_13-24.png
- \* EvolvingCorrelationBasins\_13-25.png
- \* EvolvingCorrelationBasins\_13-26.png
- \* EvolvingCorrelationBasins\_13-27.png
- \* EvolvingCorrelationBasins\_14-15.png
- \* EvolvingCorrelationBasins\_14-16.png
- \* EvolvingCorrelationBasins\_14-17.png
- \* EvolvingCorrelationBasins\_14-18.png
- \* EvolvingCorrelationBasins\_14-19.png
- \* EvolvingCorrelationBasins\_14-20.png
- \* EvolvingCorrelationBasins\_14-21.png
- \* EvolvingCorrelationBasins\_14-22.png
- \* EvolvingCorrelationBasins\_14-23.png
- \* EvolvingCorrelationBasins\_14-24.png
- \* EvolvingCorrelationBasins\_14-25.png
- \* EvolvingCorrelationBasins\_14-26.png
- \* EvolvingCorrelationBasins\_14-27.png
- \* EvolvingCorrelationBasins\_15-16.png
- \* EvolvingCorrelationBasins\_15-17.png
- \* EvolvingCorrelationBasins\_15-18.png
- \* EvolvingCorrelationBasins\_15-19.png
- \* EvolvingCorrelationBasins\_15-20.png
- \* EvolvingCorrelationBasins\_15-21.png
- \* EvolvingCorrelationBasins\_15-22.png
- \* EvolvingCorrelationBasins\_15-23.png
- \* EvolvingCorrelationBasins\_15-24.png
- \* EvolvingCorrelationBasins\_15-25.png
- \* EvolvingCorrelationBasins\_15-26.png
- \* EvolvingCorrelationBasins\_15-27.png
- \* EvolvingCorrelationBasins\_16-17.png
- \* EvolvingCorrelationBasins\_16-18.png
- \* EvolvingCorrelationBasins\_16-19.png
- \* EvolvingCorrelationBasins\_16-20.png
- \* EvolvingCorrelationBasins\_16-21.png
- \* EvolvingCorrelationBasins\_16-22.png
- \* EvolvingCorrelationBasins\_16-23.png
- \* EvolvingCorrelationBasins\_16-24.png
- \* EvolvingCorrelationBasins\_16-25.png
- \* EvolvingCorrelationBasins\_16-26.png
- \* EvolvingCorrelationBasins\_16-27.png
- \* EvolvingCorrelationBasins\_17-18.png
- \* EvolvingCorrelationBasins\_17-19.png

- \* EvolvingCorrelationBasins\_17-20.png
- \* EvolvingCorrelationBasins\_17-21.png
- \* EvolvingCorrelationBasins\_17-22.png
- \* EvolvingCorrelationBasins\_17-23.png
- \* EvolvingCorrelationBasins\_17-24.png
- \* EvolvingCorrelationBasins\_17-25.png
- \* EvolvingCorrelationBasins\_17-26.png
- \* EvolvingCorrelationBasins\_17-27.png
- \* EvolvingCorrelationBasins\_18-19.png
- \* EvolvingCorrelationBasins\_18-20.png
- \* EvolvingCorrelationBasins\_18-21.png
- \* EvolvingCorrelationBasins\_18-22.png
- \* EvolvingCorrelationBasins\_18-23.png
- \* EvolvingCorrelationBasins\_18-24.png
- \* EvolvingCorrelationBasins\_18-25.png
- \* EvolvingCorrelationBasins\_18-26.png
- \* EvolvingCorrelationBasins\_18-27.png
- \* EvolvingCorrelationBasins\_19-20.png
- \* EvolvingCorrelationBasins\_19-21.png
- \* EvolvingCorrelationBasins\_19-22.png
- \* EvolvingCorrelationBasins\_19-23.png
- \* EvolvingCorrelationBasins\_19-24.png
- \* EvolvingCorrelationBasins\_19-25.png
- \* EvolvingCorrelationBasins\_19-26.png
- \* EvolvingCorrelationBasins\_19-27.png
- \* EvolvingCorrelationBasins\_2-10.png
- \* EvolvingCorrelationBasins\_2-11.png
- \* EvolvingCorrelationBasins\_2-12.png
- \* EvolvingCorrelationBasins\_2-13.png
- \* EvolvingCorrelationBasins\_2-14.png
- \* EvolvingCorrelationBasins\_2-15.png
- \* EvolvingCorrelationBasins\_2-16.png
- \* EvolvingCorrelationBasins\_2-17.png
- \* EvolvingCorrelationBasins\_2-18.png
- \* EvolvingCorrelationBasins\_2-19.png
- \* EvolvingCorrelationBasins\_2-20.png
- \* EvolvingCorrelationBasins\_2-21.png
- \* EvolvingCorrelationBasins\_2-22.png
- \* EvolvingCorrelationBasins\_2-23.png
- \* EvolvingCorrelationBasins\_2-24.png
- \* EvolvingCorrelationBasins\_2-25.png
- \* EvolvingCorrelationBasins\_2-26.png
- \* EvolvingCorrelationBasins\_2-27.png
- \* EvolvingCorrelationBasins\_2-3.png
- \* EvolvingCorrelationBasins\_2-4.png
- \* EvolvingCorrelationBasins\_2-5.png
- \* EvolvingCorrelationBasins\_2-6.png

- \* EvolvingCorrelationBasins\_2-7.png
- \* EvolvingCorrelationBasins\_2-8.png
- \* EvolvingCorrelationBasins\_2-9.png
- \* EvolvingCorrelationBasins\_20-21.png
- \* EvolvingCorrelationBasins\_20-22.png
- \* EvolvingCorrelationBasins\_20-23.png
- \* EvolvingCorrelationBasins\_20-24.png
- \* EvolvingCorrelationBasins\_20-25.png
- \* EvolvingCorrelationBasins\_20-26.png
- \* EvolvingCorrelationBasins\_20-27.png
- \* EvolvingCorrelationBasins\_21-22.png
- \* EvolvingCorrelationBasins\_21-23.png
- \* EvolvingCorrelationBasins\_21-24.png
- \* EvolvingCorrelationBasins\_21-25.png
- \* EvolvingCorrelationBasins\_21-26.png
- \* EvolvingCorrelationBasins\_21-27.png
- \* EvolvingCorrelationBasins\_22-23.png
- \* EvolvingCorrelationBasins\_22-24.png
- \* EvolvingCorrelationBasins\_22-25.png
- \* EvolvingCorrelationBasins\_22-26.png
- \* EvolvingCorrelationBasins\_22-27.png
- \* EvolvingCorrelationBasins\_23-24.png
- \* EvolvingCorrelationBasins\_23-25.png
- \* EvolvingCorrelationBasins\_23-26.png
- \* EvolvingCorrelationBasins\_23-27.png
- \* EvolvingCorrelationBasins\_24-25.png
- \* EvolvingCorrelationBasins\_24-26.png
- \* EvolvingCorrelationBasins\_24-27.png
- \* EvolvingCorrelationBasins\_25-26.png
- \* EvolvingCorrelationBasins\_25-27.png
- \* EvolvingCorrelationBasins\_26-27.png
- \* EvolvingCorrelationBasins\_3-10.png
- \* EvolvingCorrelationBasins\_3-11.png
- \* EvolvingCorrelationBasins\_3-12.png
- \* EvolvingCorrelationBasins\_3-13.png
- \* EvolvingCorrelationBasins\_3-14.png
- \* EvolvingCorrelationBasins\_3-15.png
- \* EvolvingCorrelationBasins\_3-16.png
- \* EvolvingCorrelationBasins\_3-17.png
- \* EvolvingCorrelationBasins\_3-18.png
- \* EvolvingCorrelationBasins\_3-19.png
- \* EvolvingCorrelationBasins\_3-20.png
- \* EvolvingCorrelationBasins\_3-21.png
- \* EvolvingCorrelationBasins\_3-22.png
- \* EvolvingCorrelationBasins\_3-23.png
- \* EvolvingCorrelationBasins\_3-24.png
- \* EvolvingCorrelationBasins\_3-25.png

- \* EvolvingCorrelationBasins\_3-26.png
- \* EvolvingCorrelationBasins\_3-27.png
- \* EvolvingCorrelationBasins\_3-4.png
- \* EvolvingCorrelationBasins\_3-5.png
- \* EvolvingCorrelationBasins\_3-6.png
- \* EvolvingCorrelationBasins\_3-7.png
- \* EvolvingCorrelationBasins\_3-8.png
- \* EvolvingCorrelationBasins\_3-9.png
- \* EvolvingCorrelationBasins\_4-10.png
- \* EvolvingCorrelationBasins\_4-11.png
- \* EvolvingCorrelationBasins\_4-12.png
- \* EvolvingCorrelationBasins\_4-13.png
- \* EvolvingCorrelationBasins\_4-14.png
- \* EvolvingCorrelationBasins\_4-15.png
- \* EvolvingCorrelationBasins\_4-16.png
- \* EvolvingCorrelationBasins\_4-17.png
- \* EvolvingCorrelationBasins\_4-18.png
- \* EvolvingCorrelationBasins\_4-19.png
- \* EvolvingCorrelationBasins\_4-20.png
- \* EvolvingCorrelationBasins\_4-21.png
- \* EvolvingCorrelationBasins\_4-22.png
- \* EvolvingCorrelationBasins\_4-23.png
- \* EvolvingCorrelationBasins\_4-24.png
- \* EvolvingCorrelationBasins\_4-25.png
- \* EvolvingCorrelationBasins\_4-26.png
- \* EvolvingCorrelationBasins\_4-27.png
- \* EvolvingCorrelationBasins\_4-5.png
- \* EvolvingCorrelationBasins\_4-6.png
- \* EvolvingCorrelationBasins\_4-7.png
- \* EvolvingCorrelationBasins\_4-8.png
- \* EvolvingCorrelationBasins\_4-9.png
- \* EvolvingCorrelationBasins\_5-10.png
- \* EvolvingCorrelationBasins\_5-11.png
- \* EvolvingCorrelationBasins\_5-12.png
- \* EvolvingCorrelationBasins\_5-13.png
- \* EvolvingCorrelationBasins\_5-14.png
- \* EvolvingCorrelationBasins\_5-15.png
- \* EvolvingCorrelationBasins\_5-16.png
- \* EvolvingCorrelationBasins\_5-17.png
- \* EvolvingCorrelationBasins\_5-18.png
- \* EvolvingCorrelationBasins\_5-19.png
- \* EvolvingCorrelationBasins\_5-20.png
- \* EvolvingCorrelationBasins\_5-21.png
- \* EvolvingCorrelationBasins\_5-22.png
- \* EvolvingCorrelationBasins\_5-23.png
- \* EvolvingCorrelationBasins\_5-24.png
- \* EvolvingCorrelationBasins\_5-25.png



- \* EvolvingCorrelationBasins\_5-26.png
- \* EvolvingCorrelationBasins\_5-27.png
- \* EvolvingCorrelationBasins\_5-6.png
- \* EvolvingCorrelationBasins\_5-7.png
- \* EvolvingCorrelationBasins\_5-8.png
- \* EvolvingCorrelationBasins\_5-9.png
- \* EvolvingCorrelationBasins\_6-10.png
- \* EvolvingCorrelationBasins\_6-11.png
- \* EvolvingCorrelationBasins\_6-12.png
- \* EvolvingCorrelationBasins\_6-13.png
- \* EvolvingCorrelationBasins\_6-14.png
- \* EvolvingCorrelationBasins\_6-15.png
- \* EvolvingCorrelationBasins\_6-16.png
- \* EvolvingCorrelationBasins\_6-17.png
- \* EvolvingCorrelationBasins\_6-18.png
- \* EvolvingCorrelationBasins\_6-19.png
- \* EvolvingCorrelationBasins\_6-20.png
- \* EvolvingCorrelationBasins\_6-21.png
- \* EvolvingCorrelationBasins\_6-22.png
- \* EvolvingCorrelationBasins\_6-23.png
- \* EvolvingCorrelationBasins\_6-24.png
- \* EvolvingCorrelationBasins\_6-25.png
- \* EvolvingCorrelationBasins\_6-26.png
- \* EvolvingCorrelationBasins\_6-27.png
- \* EvolvingCorrelationBasins\_6-7.png
- \* EvolvingCorrelationBasins\_6-8.png
- \* EvolvingCorrelationBasins\_6-9.png
- \* EvolvingCorrelationBasins\_7-10.png
- \* EvolvingCorrelationBasins\_7-11.png
- \* EvolvingCorrelationBasins\_7-12.png
- \* EvolvingCorrelationBasins\_7-13.png
- \* EvolvingCorrelationBasins\_7-14.png
- \* EvolvingCorrelationBasins\_7-15.png
- \* EvolvingCorrelationBasins\_7-16.png
- \* EvolvingCorrelationBasins\_7-17.png
- \* EvolvingCorrelationBasins\_7-18.png
- \* EvolvingCorrelationBasins\_7-19.png
- \* EvolvingCorrelationBasins\_7-20.png
- \* EvolvingCorrelationBasins\_7-21.png
- \* EvolvingCorrelationBasins\_7-22.png
- \* EvolvingCorrelationBasins\_7-23.png
- \* EvolvingCorrelationBasins\_7-24.png
- \* EvolvingCorrelationBasins\_7-25.png
- \* EvolvingCorrelationBasins\_7-26.png
- \* EvolvingCorrelationBasins\_7-27.png
- \* EvolvingCorrelationBasins\_7-8.png
- \* EvolvingCorrelationBasins\_7-9.png

- \* EvolvingCorrelationBasins\_8-10.png
- \* EvolvingCorrelationBasins\_8-11.png
- \* EvolvingCorrelationBasins\_8-12.png
- \* EvolvingCorrelationBasins\_8-13.png
- \* EvolvingCorrelationBasins\_8-14.png
- \* EvolvingCorrelationBasins\_8-15.png
- \* EvolvingCorrelationBasins\_8-16.png
- \* EvolvingCorrelationBasins\_8-17.png
- \* EvolvingCorrelationBasins\_8-18.png
- \* EvolvingCorrelationBasins\_8-19.png
- \* EvolvingCorrelationBasins\_8-20.png
- \* EvolvingCorrelationBasins\_8-21.png
- \* EvolvingCorrelationBasins\_8-22.png
- \* EvolvingCorrelationBasins\_8-23.png
- \* EvolvingCorrelationBasins\_8-24.png
- \* EvolvingCorrelationBasins\_8-25.png
- \* EvolvingCorrelationBasins\_8-26.png
- \* EvolvingCorrelationBasins\_8-27.png
- \* EvolvingCorrelationBasins\_8-9.png
- \* EvolvingCorrelationBasins\_9-10.png
- \* EvolvingCorrelationBasins\_9-11.png
- \* EvolvingCorrelationBasins\_9-12.png
- \* EvolvingCorrelationBasins\_9-13.png
- \* EvolvingCorrelationBasins\_9-14.png
- \* EvolvingCorrelationBasins\_9-15.png
- \* EvolvingCorrelationBasins\_9-16.png
- \* EvolvingCorrelationBasins\_9-17.png
- \* EvolvingCorrelationBasins\_9-18.png
- \* EvolvingCorrelationBasins\_9-19.png
- \* EvolvingCorrelationBasins\_9-20.png
- \* EvolvingCorrelationBasins\_9-21.png
- \* EvolvingCorrelationBasins\_9-22.png
- \* EvolvingCorrelationBasins\_9-23.png
- \* EvolvingCorrelationBasins\_9-24.png
- \* EvolvingCorrelationBasins\_9-25.png
- \* EvolvingCorrelationBasins\_9-26.png
- \* EvolvingCorrelationBasins\_9-27.png

– README

The copyright of individual parts of the supplement might differ from the CC BY 3.0 License.
